# Supplementary material for: NaGaPO4F – a KTiOPO4-structured solid sodium-ion conductor
Source: Royal Society of Chemistry journal article supplement (doi:10.1039/d3dt03107a), 2023-01-01
Supplement: d3dt03107a1.pdf [file d3dt03107a1.pdf]

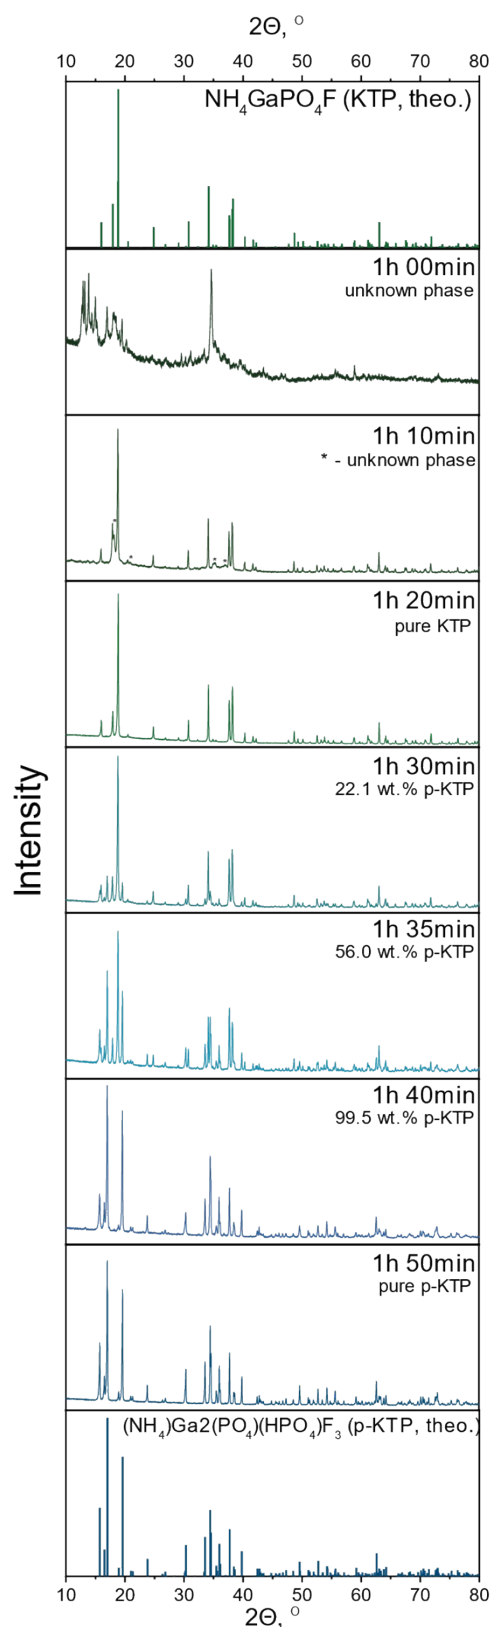

**Supplementary Figure 1.** XRD of different powders obtained with different heating time. The data collected using a Huber G670 Guinier diffractometer ( $\text{CoK}\alpha_1$  radiation ( $\lambda = 1.78892 \text{ \AA}$ ), with Ge (111) monochromator and image plate detector. The patterns were measured at ambient temperature with a step of  $0.005^\circ$  within the  $4\text{-}100^\circ$   $2\theta$  range. For better representation  $10\text{-}80$   $2\theta$  range is given. Phase fraction were determined via the Rietveld refinement.

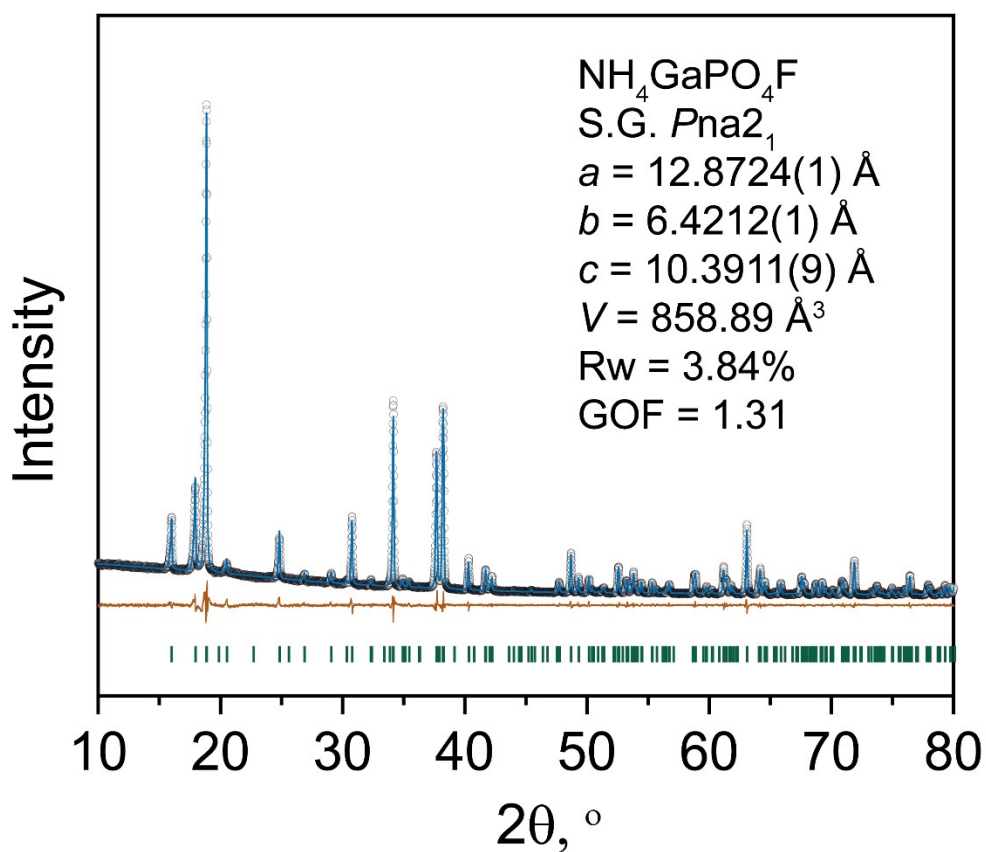

**Supplementary Figure 2.** Le Bail fitting of the X-ray powder diffraction pattern for  $\text{NH}_4\text{GaPO}_4\text{F}$ .

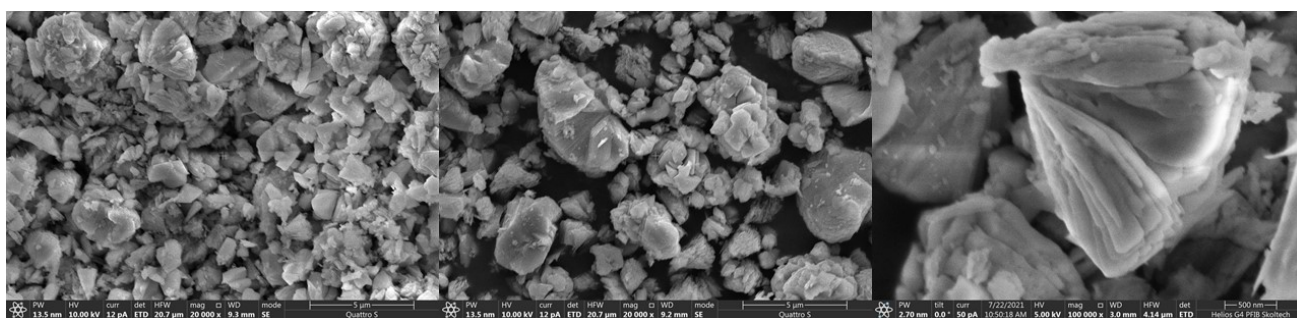

**Supplementary figure 3.** SEM images of  $\text{NH}_4\text{GaPO}_4\text{F}$  (left) and  $\text{NaGaPO}_4\text{F}$  (middle and right) powders.

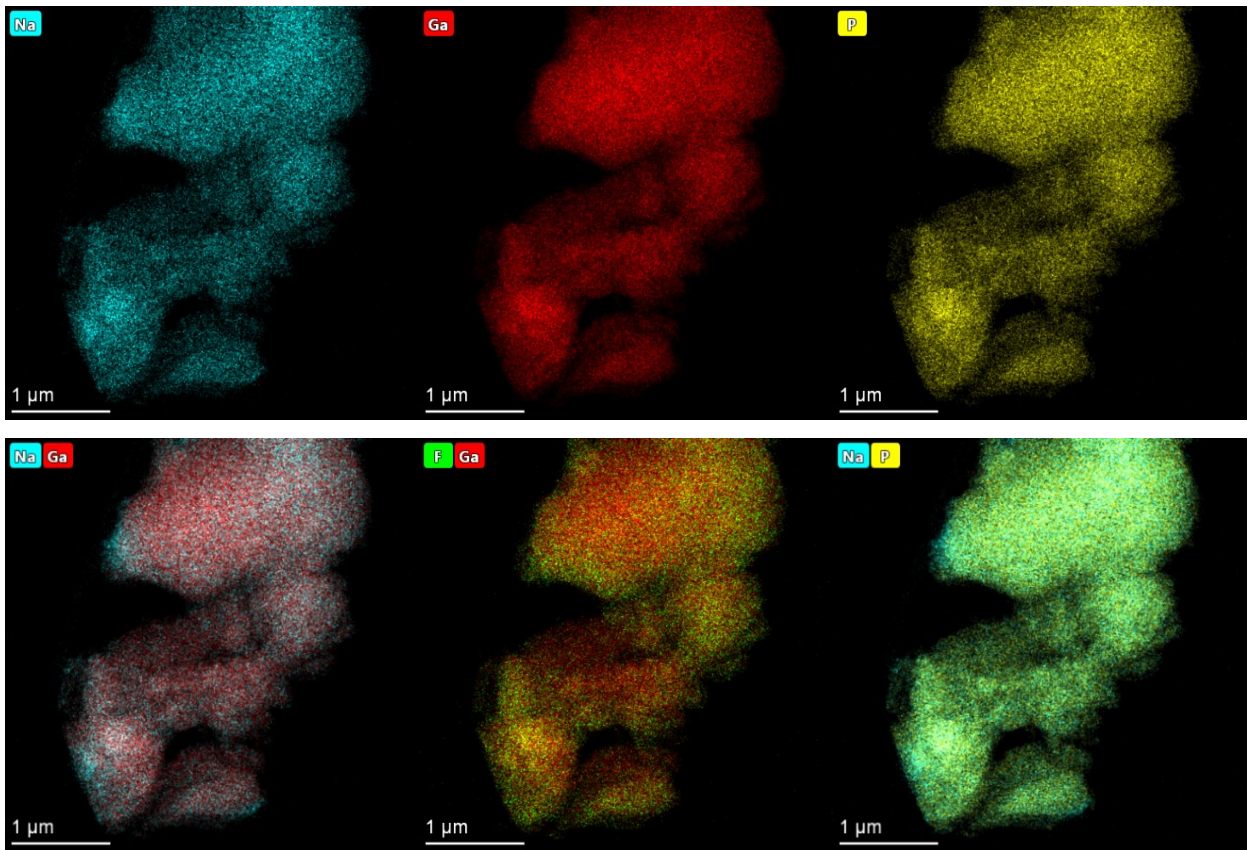

**Supplementary figure 4.** Elemental distribution maps of Na, Ga, F and P.

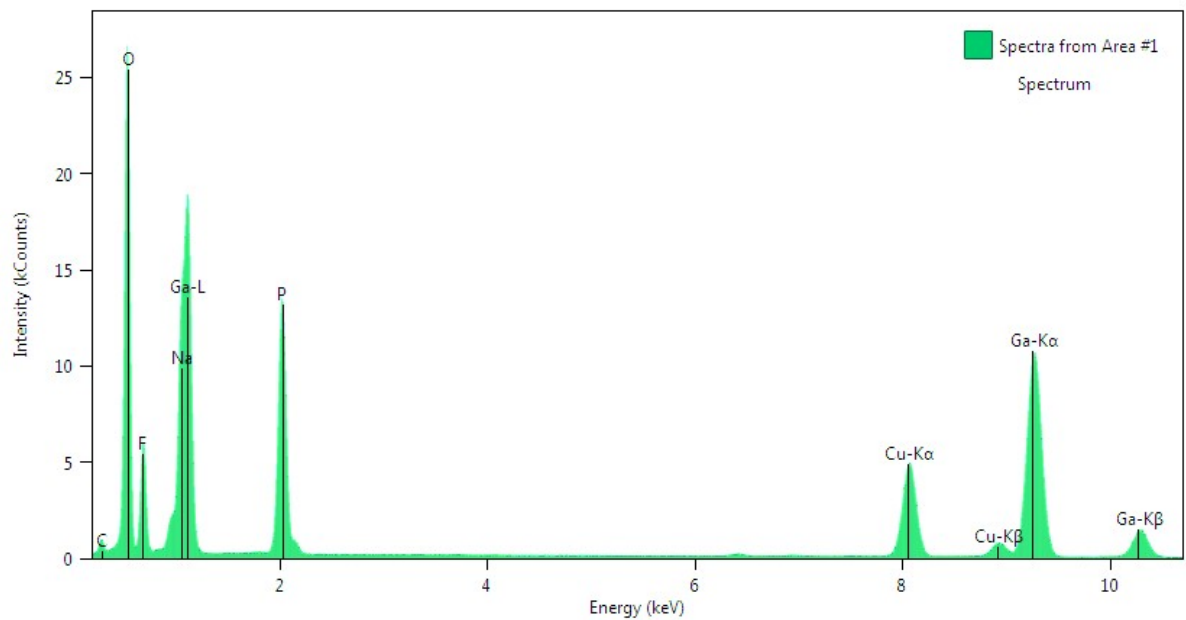

**Supplementary figure 5.** Typical EDX spectrum of NaGaPO<sub>4</sub>F.

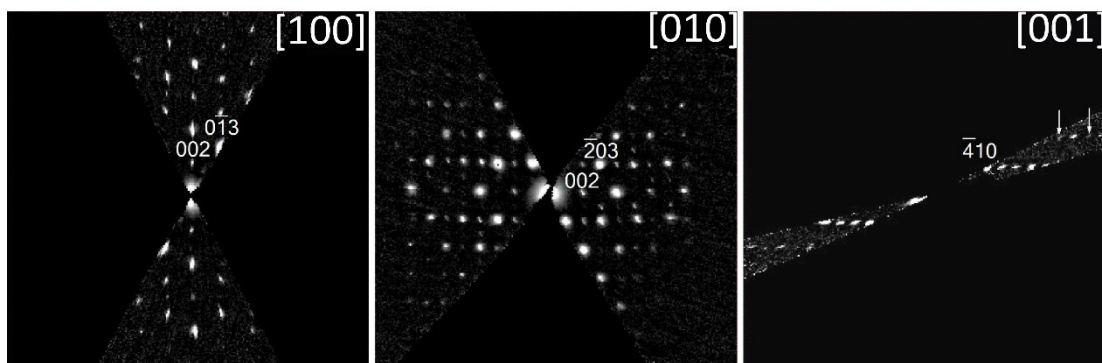

**Supplementary figure 6.** Electron diffraction tomography patterns of NaGaPO<sub>4</sub>F

**Supplementary table 1.** Parameters of the Rietveld refinement.

|                           |                           |
|---------------------------|---------------------------|
| Formula                   | NaGaPO <sub>4</sub> F     |
| Space Group               | <i>Pna</i> 2 <sub>1</sub> |
| <i>a</i> , Å              | 12.49296(15)              |
| <i>b</i> , Å              | 6.10945(8)                |
| <i>c</i> , Å              | 10.41321(13)              |
| <i>V</i> , Å <sup>3</sup> | 794.789(17)               |
| GOF                       | 3.44                      |
| <i>R<sub>p</sub></i> , %  | 1.15                      |
| <i>R<sub>wp</sub></i> , % | 1.53                      |

**Supplementary Table 2.** Atomic coordinates and isotropic atomic displacement parameters.

| Atom  | <i>x/a</i> | <i>y/b</i> | <i>z/c</i> | Occupancy | <i>U</i> <sub>iso</sub> , Å <sup>2</sup> |
|-------|------------|------------|------------|-----------|------------------------------------------|
| Na1   | 0.8582(4)  | 0.7151(7)  | 0.0480(4)  | 1.0       | 0.036(1)                                 |
| Na2.1 | 0.8990(5)  | 0.2683(10) | 0.3346(8)  | 0.7880    | 0.036(1)                                 |

|       |             |             |             |        |           |
|-------|-------------|-------------|-------------|--------|-----------|
| Na2.2 | 0.9173(18)  | 0.323(5)    | 0.393(3)    | 0.2120 | 0.036(1)  |
| Ga1   | 0.38928(8)  | 0.51449(17) | 0.76610(18) | 1.0    | 0.0054(1) |
| Ga2   | 0.23257(6)  | 0.26271(18) | 0.000000    | 1.0    | 0.0054(1) |
| P1    | 0.4832(2)   | 0.3238(4)   | 0.0225(4)   | 1.0    | 0.0077(4) |
| P2    | 0.18708(16) | 0.5166(5)   | 0.2568(4)   | 1.0    | 0.0077(4) |
| O1    | 0.4708(4)   | 0.5070(11)  | -0.0774(5)  | 1.0    | 0.0062(4) |
| O2    | 0.4930(5)   | 0.4389(7)   | 0.1532(5)   | 1.0    | 0.0062(4) |
| O3    | 0.3829(4)   | 0.1783(8)   | 0.0221(7)   | 1.0    | 0.0062(4) |
| O4    | 0.5821(4)   | 0.1817(8)   | -0.0024(8)  | 1.0    | 0.0062(4) |
| O5    | 0.1195(4)   | 0.3176(8)   | 0.2966(7)   | 1.0    | 0.0062(4) |
| O6    | 0.1115(4)   | 0.7137(8)   | 0.2456(5)   | 1.0    | 0.0062(4) |
| O7    | 0.2742(5)   | 0.5530(9)   | 0.3601(7)   | 1.0    | 0.0062(4) |
| O8    | 0.2501(4)   | 0.4978(15)  | 0.1303(7)   | 1.0    | 0.0062(4) |
| F1    | 0.2849(4)   | 0.5265(10)  | 0.6244(5)   | 1.0    | 0.0090(9) |

|    |           |            |           |     |           |
|----|-----------|------------|-----------|-----|-----------|
| F2 | 0.2558(4) | 0.4845(13) | 0.8791(5) | 1.0 | 0.0090(9) |
|----|-----------|------------|-----------|-----|-----------|

**Supplementary Table 3.** Interatomic distances.

| Bond   | Distance, Å | Bond  | Distance, Å |
|--------|-------------|-------|-------------|
| Ga1-O1 | 1.922(5)    | P1-O1 | 1.536(6)    |
| Ga1-O2 | 1.904(6)    | P1-O2 | 1.537(6)    |
| Ga1-O5 | 1.882(5)    | P1-O3 | 1.536(5)    |
| Ga1-O6 | 1.850(5)    | P1-O4 | 1.532(5)    |
| Ga1-F1 | 1.970(5)    | P2-O5 | 1.537(6)    |
| Ga1-F2 | 2.049(5)    | P2-O6 | 1.535(6)    |
| Ga2-O3 | 1.961(4)    | P2-O7 | 1.546(7)    |
| Ga2-O4 | 1.911(4)    | P2-O8 | 1.540(7)    |
| Ga2-O7 | 1.942(6)    |       |             |
| Ga2-O8 | 1.987(8)    |       |             |
| Ga2-F1 | 1.952(6)    |       |             |
| Ga2-F2 | 1.873(6)    |       |             |

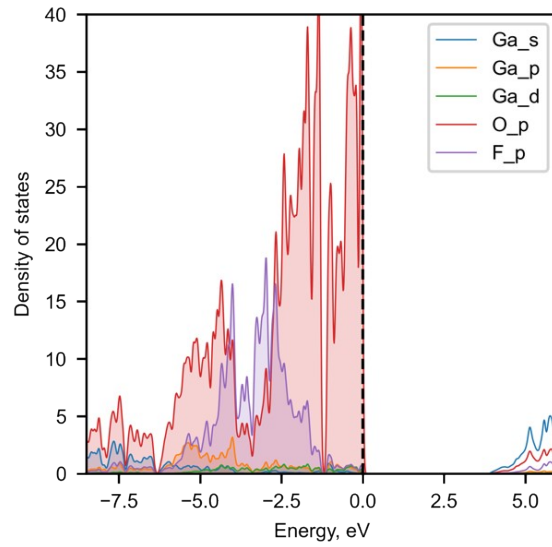

**Supplementary figure 7.** The orbital-projected density of states for Ga, O and F atoms in NaGaPO<sub>4</sub>F calculated with GGA PBE.

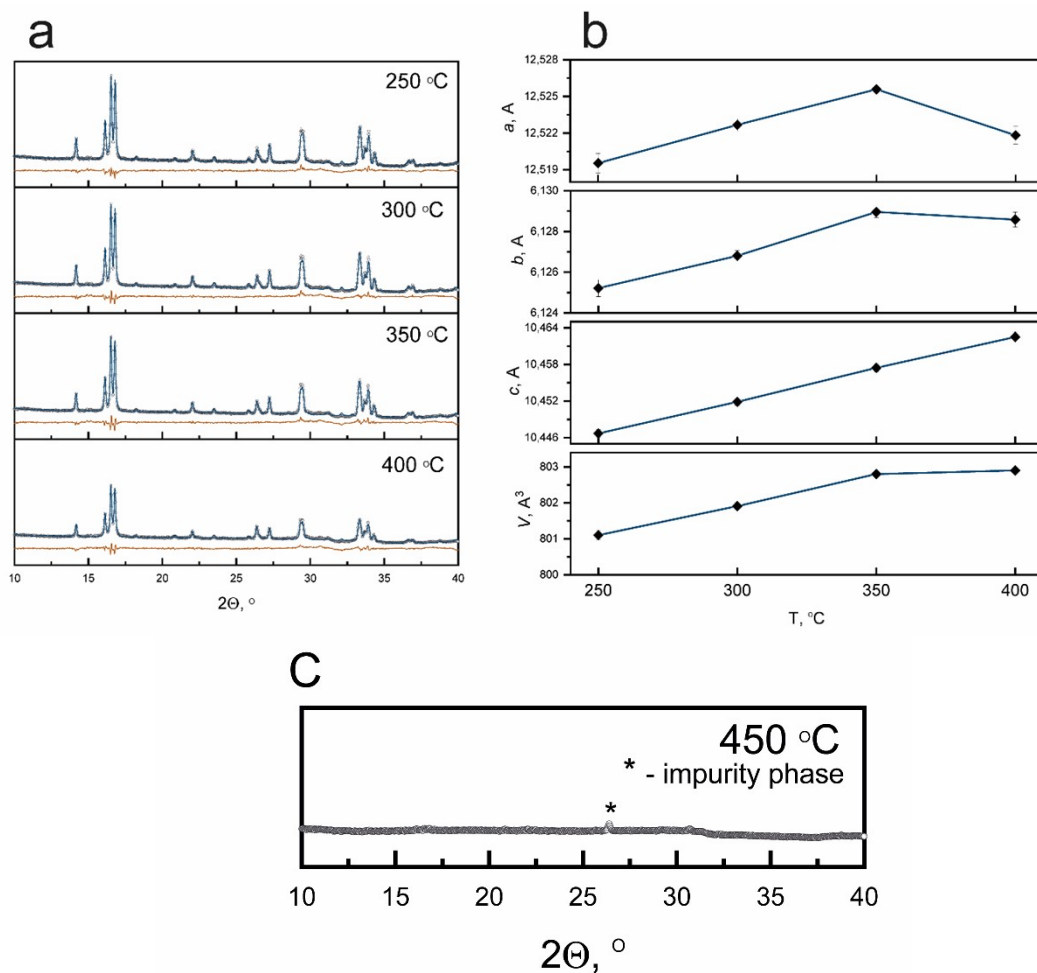

**Supplementary Figure 8.** High temperature XRD pattern of NaGaPO<sub>4</sub>F (a), unit cell parameters at different temperatures (b), and XRD pattern of NaGaPO<sub>4</sub>F at 450°C (c)

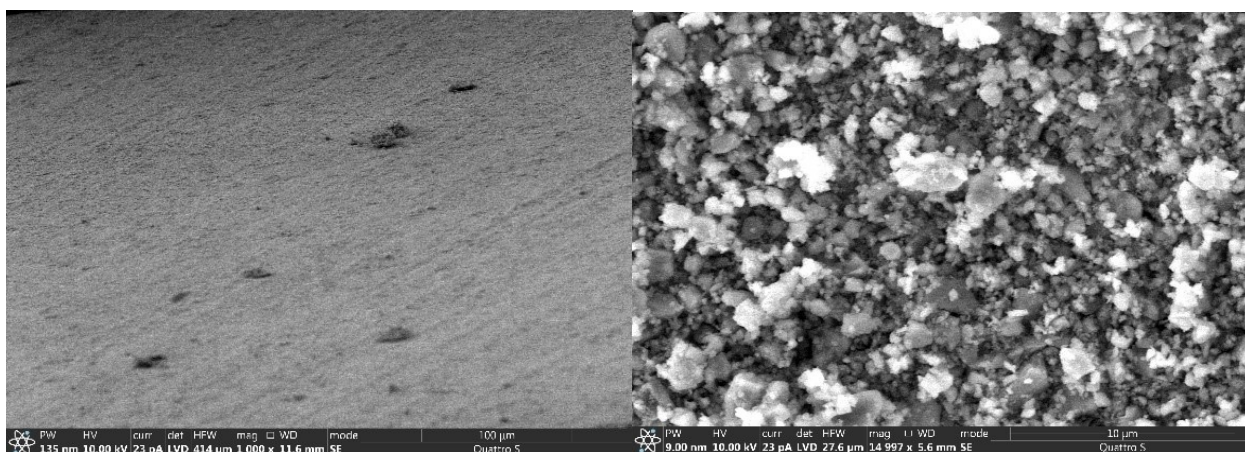

**Supplementary figure 9.** SEM images of cross-section NaGaPO<sub>4</sub>F pellet.

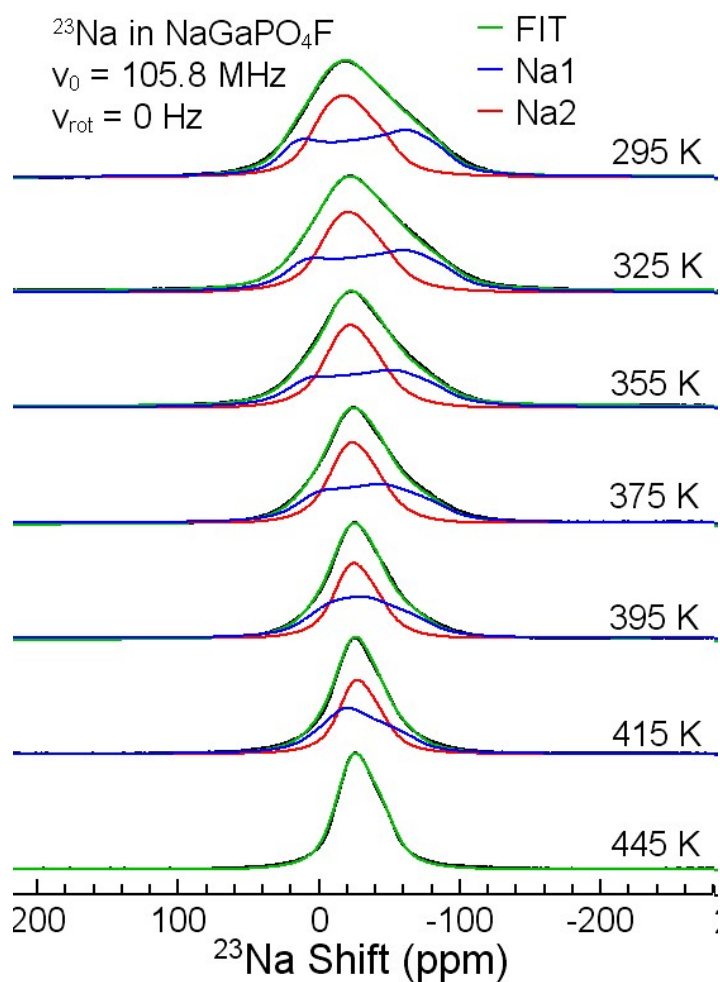

**Supplementary figure 10.** Typical <sup>23</sup>Na NMR spectra obtained at the resonance frequency  $\nu_0 = 105.8$  MHz with MAS speed,  $\nu_{rot} = 0$  Hz, in the temperature range 295-445 K for NaGaPO<sub>4</sub>F. The colored lines show the results of spectra deconvolution (see text)



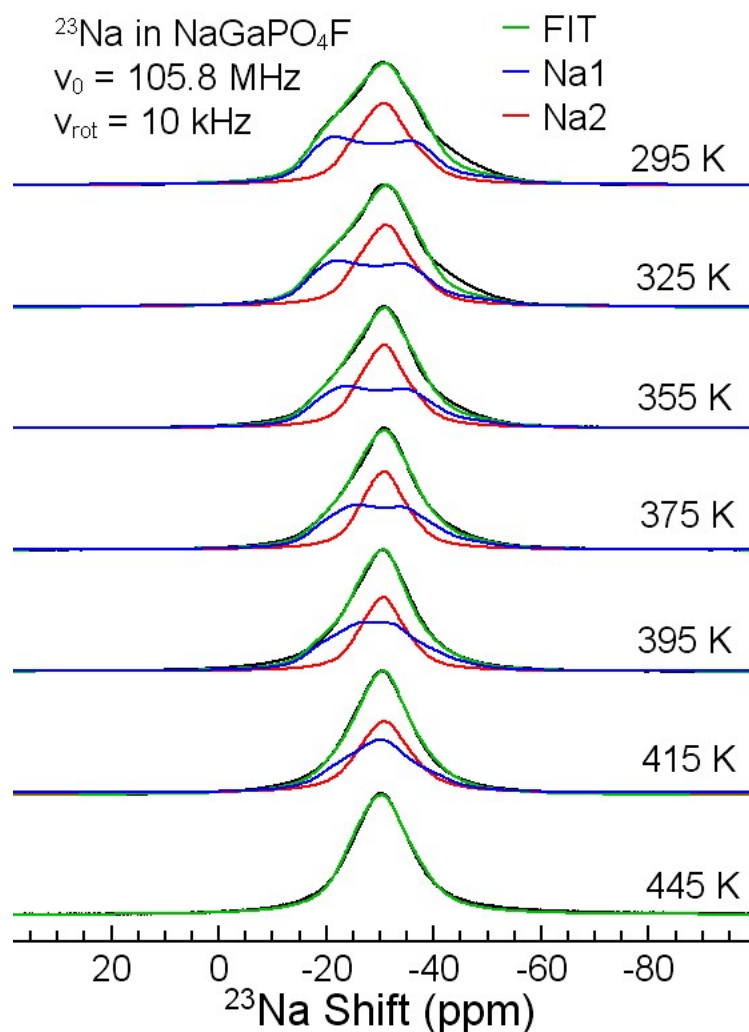

**Supplementary figure 11.** Typical  $^{23}\text{Na}$  NMR spectra acquired at the resonance frequency  $\nu_0 = 105.8$  MHz with MAS speed,  $\nu_{\text{rot}} = 10$  kHz, in the temperature range 295-445 K for  $\text{NaGaPO}_4\text{F}$ . The colored lines show the results of spectra deconvolution (see text)

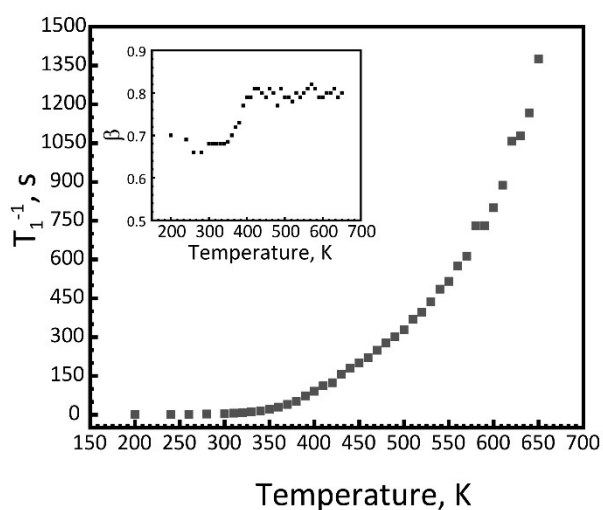

**Supplementary figure 12.** Spin-lattice relaxation rate of the  $^{23}\text{Na}$  nuclei in  $\text{NaGaPO}_4\text{F}$ , measured at a resonance frequency  $\nu_0 = 132.3$  MHz in the temperature range 200-650 K. The inset shows the temperature behavior of the coefficient  $\beta$

**Supplementary table 4.** Comparison of DFT relaxed and experimentally refined lattice parameters.

|                        | SXRD         | DFT    | Diff, % |
|------------------------|--------------|--------|---------|
| $a$ , Å                | 12.49287(15) | 12.67  | -1.40   |
| $b$ , Å                | 6.10929(8)   | 6.21   | -1.62   |
| $c$ , Å                | 10.41331(13) | 10.56  | -1.39   |
| Volume, Å <sup>3</sup> | 794.772(17)  | 831.36 | -4.40   |

**Supplementary table 5.** NEB calculated activation barriers for the selected Na vacancy-assisted hops. The hop distance was calculated as a sum of linear segments between images.

| Na hop | Activation energy, eV | Pathway distance, Å | Hop distance, Å |
|--------|-----------------------|---------------------|-----------------|
| P1     | 0.12                  | 4.40                | 4.35            |
| P2     | 0.22                  | 4.04                | 3.86            |
| P3     | 0.13                  | 3.93                | 3.81            |
